# Supplementary material
Source: publisher site journal article supplement (https://www.dovepress.com/article/376419)
Supplement: Supplementary file 1 [file get_supplementary_file.php]

Supplementary Material Table 1: Full list of inpatient unit teams contacted

**Teams contacted Frequency**

**General Medicine 48**

**General Surgery 30**

**Short Stay Unit 26**

**Cardiology 13**

**Orthopaedics 12**

**COVID Medicine 11**

**Gastroenterology 10**

**Oncology 8**

**Neurosurgery 8**

**Plastic Surgery 7**

**Psychiatry 6**

**Neurology 6**

**Infectious diseases 6**

**Endocrinology 6**

**Urology 5**

**Gynaecology 4**

**Paediatrics 4**

**Geriatric Medicine 4**

**Stroke 3**

**Spinal Medicine 2**

**Rheumatology 2**

**Respiratory Medicine 2**

**Intensive Care Unit 2**

**Ear Nose and Throat Surgery 2**

**Renal 1**

**Palliative Care 1**

**Colorectal 1**

**Toxicology 1**

**Paediatric infant Perinatal emergency retrieval 1**

**Cardiac Surgery 1**

**Eating Disorders 1**

**Teams contacted Frequency**

**General Medicine 48**

**General Surgery 30**

**SSU 26**

**Cardiology 13**

**Orthopaedics 12**

**COVID Medicine 11**

**Gastroenterology 10**

**Oncology 8**

**Neurosurgery 8**

**Plastic Surgery 7**

**Acute Psychiatry Services 6**

**Neurology 6**

**Infectious diseases 6**

**Endocrinology 6**

**Urology 5**

**Gynaecology 5**

**Paediatrics 4**

**Geriatric Medicine 4**

**Stroke 3**

**Spinal Medicine 2**

**Rheumatology 2**

**Respiratory Medicine 2**

**ICU 2**

**ENT 2**

**Renal 1**

| ID  Supplementary Material Table 2: ED diagnosis, order of inpatient units referred, admission unit, level of care | ED Diagnosis | Inpatient unit 1 | Inpatient unit 2 | Inpatient unit 3 | Inpatient unit 4 | Admission Destination |
| --- | --- | --- | --- | --- | --- | --- |
| 1 | Infective Endocarditis | Infectious Diseases | Cardiology |  |  | Infectious Diseases |
| 2 | Fall, hypernatremia | SSU | Endocrinology | Gen med |  | Gen med |
| 3 | Acute kidney injury, abdominal pain | Gen surg | SSU | Gastroenterology |  | Gastroenterology |
| 4 | Back pain | SSU | Infectious Diseases | Gen med |  | Infectious Diseases |
| 5 | Chronic obstructive pulmonary disease exacerbation, rapid atrial fibrillation | Gen med | Respiratory Medicine |  |  | Gen med |
| 6 | Scrotal oedema | Gen surg |  |  |  | Discharge |
| 7 | Open foot fracture | Orthopedic Surgery | Plastic Surgery |  |  | Orthopaedic Surgery |
| 8 | Post-operative fever | Gen surg | Gastroenterology |  |  | Gen surg |
| 9 | Iritis | SSU | Ophthalmology | Rheumatology |  | Discharge |
| 10 | Hyponatremia | Gen med | Endocrinology |  |  | Gen med |
| 11 | Radial Neck fracture | Orthopedic Surgery |  |  |  | Discharge |
| 12 | Testicular torsion | Urology |  |  |  | Urology |
| 13 | Social crisis | Psychiatry | Pediatrics | Gen med |  | Discharge |
| 14 | Abdominal pain | Gastroenterology | SSU |  |  | Discharge |
| 15 | Limb weakness | Orthopedic Surgery | SSU |  |  | Discharge |
| 16 | Syncope | Stroke | Cardiology | Cardiac Surgery |  | Cardiology |
| 17 | Colitis | SSU | Gen surg | Gen med |  | Gen surg |
| 18 | Pulmonary embolism | Gen med | Orthopedic Surgery | Hematology | Respiratory Medicine | Gen med |
| 19 | Pulmonary embolism | SSU | Gen med | Oncology |  | SSU |
| 20 | Diverticulitis with perforation | SSU | Gastroenterology | Gen surg |  | SSU |
| 21 | Radiculopathy | SSU | Rheumatology | Neurosurgery |  | SSU |
| 22 | Acute coronary syndrome | Cardiology |  |  |  | Cardiology |
| 23 | Hypertension | SSU | Cardiology | Gen med |  | Gen med |
| 24 | Renal colic, acute kidney injury | Urology |  |  |  | Urology |
| 25 | Bowel perforation | Gynecology | Gen Surg |  |  | Gen surg |
| 26 | Renal colic | Urology |  |  |  | Urology |
| 27 | Acute kidney injury | Oncology | Gen surg | Urology |  | Oncology |
| 28 | Acute coronary syndrome | Cardiology | SSU |  |  | Cardiology |
| 29 | Rhabdomyolysis | Gen med | SSU |  |  | Gen med |
| 30 | Fractured neck of humerus | Gen med | Orthopedic Surgery |  |  | Gen med |
| 31 | Acute kidney injury, atrial fibrillation | Gen med | Cardiology |  |  | Gen med |
| 32 | Pneumonia c | Pediatrics | ICU | Pediatric Infant Perinatal Emergency Retrieval | Dermatology | ICU --> Paediatrics |
| 33 | Syncope | Cardiology | Gen med |  |  | Gen med |
| 34 | Diverticulitis | Gen surg |  |  |  | Gen surg |
| 35 | Appendicitis | Gen surg |  |  |  | Gen surg |
| 36 | Intracranial metastasis | Oncology | Neurosurgery | Gen med |  | Oncology |
| 37 | Acute on chronic subdural bleed | Neurosurgery |  |  |  | Neurosurgery |
| 38 | Hypertensive urgency | Gen med | Neurosurgery | Neurology |  | Gen med |
| 39 | Acute kidney injury, atrial fibrillation | Gen med |  |  |  | Gen med |
| 40 | Pneumonia | Plastic Surgery | Gen med | Infectious Diseases |  | Gen med |
| 41 | Transient ischemic attack | Cardiology | Neurology | SSU |  | Stroke |
| 42 | Fractured wrist | Gen med | Orthopedic Surgery | SSU | Geriatric Medicine | Geriatric Medicine |
| 43 | Viral meningitis | Infectious Diseases | Neurology | Neurosurgery |  | Infectious Diseases |
| 44 | Acute kidney injury, functional decline | Gen med |  |  |  | Gen med |
| 45 | Iron deficiency anemia | Oncology | Cardiology | Gen med | Gastroenterology | Gen med |
| 46 | Stroke | Stroke | Gen med |  |  | Gen med |
| 47 | Lower respiratory tract infection, Sepsis | Gen med |  |  |  | Gen med |
| 48 | Decreased conscious state | SSU | Gen med | Cardiology |  | SSU |
| 49 | Hematuria | Spinal | Urology |  |  | Discharge |
| 50 | Subdural hematoma | Gen surg | Gen med | Neurosurgery |  | Gen surg |
| 51 | Fever, acute kidney injury | Gen med |  |  |  | Gen med |
| 52 | Per-rectal bleeding | Gen surg | Gastroenterology | Colorectal Surgery |  | Gen surg |
| 53 | Complication of percutaneous endoscopic gastrotomy tube | Gen surg | Gen surg |  |  | Gen surg |
| 54 | Deep brain stimulation battery change | Neurosurgery | Neurology |  |  | Neurology |
| 55 | Vasculitis | Infectious Diseases | Rheumatology |  |  | Infectious Diseases |
| 56 | Pelvic inflammatory disease | Gen surg | Gynecology | Gen med | Acute Pain Service | Gen med |
| 57 | Headache | SSU | Neurosurgery |  |  | SSU |
| 58 | Hyponatremia | Gen med | Endocrinology |  |  | Gen med |
| 59 | Supraventricular tachycardia with Atrial Flutter | Cardiology | Gen med |  |  | Gen med |
| 60 | Quinsy | Ear Nose Throat Surgery |  |  |  | Ear Nose Throat Surgery |
| 61 | Psychosis | Psychiatry | Pediatrics | Toxicology |  | Paediatrics |
| 62 | Metastatic malignancy | Oncology | Gen med |  |  | Oncology |
| 63 | Pleural effusion | Gen surg | Renal |  |  | Renal |
| 64 | Epistaxis | Ear Nose Throat Surgery |  |  |  | Ear Nose Throat Surgery |
| 65 | Complication of ileostomy | SSU | Gen surg |  |  | SSU |
| 66 | Pulmonary embolism | Gen med | SSU |  |  | Gen med |
| 67 | Hyperglycemia | Gen med | Endocrinology | Neurology |  | Gen med |
| 68 | Syndrome of inappropriate anti-diuretic hormone | Cardiology | SSU |  |  | Gen med |
| 69 | Back pain | Orthopedic Surgery |  |  |  | Orthopaedic Surgery |
| 70 | Anorexia nervosa | Psychiatry | Gen med |  |  | Gen med |
| 71 | Delirium | Gen med | Geriatric Medicine |  |  | Geriatric Medicine |
| 72 | Delirium | Gen med | Covid medicine |  |  | Gen med |
| 73 | Stroke | Gen surg | Stroke | Covid medicine |  | Stroke |
| 74 | Lung mass | Oncology | Covid medicine |  |  | Oncology |
| 75 | Cellulitis | Plastic Surgery | Gen med |  |  | Gen med |
| 76 | Obstructed infected renal calculi c | ICU | Covid medicine |  |  | Urology |
| 77 | Abdominal pain | Gen surg | Vascular Surgery |  |  | Neurology |
| 78 | Cellulitis | SSU | Gen med | Infectious Diseases |  | Gen med |
| 79 | Unclear b | Gen med |  |  |  | Gen med |
| 80 | Dementia | Gen med | Geriatric Medicine | Psychiatry | SSU | Geriatric Medicine |
| 81 | Cauda equina | Orthopedic Surgery | Spinal |  |  | Orthopaedic Surgery |
| 82 | Open fracture of thumb | Plastic Surgery |  |  |  | Plastic Surgery |
| 83 | Pulmonary embolism | Gen med | Gen surg |  |  | Gen med |
| 84 | Deep vein thrombosis | Gen surg | Vascular Surgery | Orthopedic Surgery | SSU | Hematology |
| 85 | Lip laceration | Plastic Surgery |  |  |  | Plastic Surgery |
| 86 | Abdominal pain | Gastroenterology | Gen med |  |  | Gen med |
| 87 | Unclear b | Gastroenterology | Covid medicine |  |  | Gastro |
| 88 | Infected foreign body (bullet) | Plastic Surgery |  |  |  | Plastic Surgery |
| 89 | Abdominal pain | Gen Surg | Gynecology |  |  | Discharge |
| 90 | Open fracture | Plastic Surgery | Orthopedic Surgery |  |  | Orthopaedic Surgery |
| 91 | Abdominal pain | Gen surg | SSU |  |  | Gen surg |
| 92 | Hypoxemia | Gynecology |  |  |  | Gen med |
| 93 | Shortness of breath | Covid medicine | Gen Surg |  |  | Covid medicine |
| 94 | Thyroid storm | SSU | Endocrinology |  |  | Endocrinology |
| 95 | Congestive cardiac failure | Gen med | Covid medicine |  |  | Gen med |
| 96 | Acute coronary syndrome | Cardiology | Covid medicine | Oncology |  | Oncology |
| 97 | Atrial fibrillation | Gen med | Geriatrics |  |  | Gen med |
| 98 | Ascending cholangitis | Gen surg | Gastroenterology |  |  | Gastroenterology |
| 99 | Fall | Gen surg | Gen med |  |  | Gen med |
| 100 | Acute pulmonary oedema | Gen med | Covid medicine |  |  | Gen med |
| 101 | Septic arthritis | Gen med | Orthopedic Surgery |  |  | Orthopaedic Surgery |
| 102 | Fall | Gen surg | Gen med |  |  | Gen surg |
| 103 | Anorexia nervosa | Gen med | Eating disorders | Psychiatry | SSU | Gen med |
| 104 | Psychosis | Psychiatry | Neurology |  |  | Neuro |
| 105 | Volvulus | Covid medicine | Gen Surg | Palliative care |  | Palliative care |
| 106 | Fever | Gen surg | Covid medicine | Oncology |  | Oncology |
| 107 | Fever | Gen surg | Gen med | Gastroenterology |  | Gen med |
| 108 | Fall | Hematology | Orthopedic Surgery |  |  | Hematology |
| 109 | Gastritis | Endocrinology | Gen Surg |  |  | Gen surg |

Abbreviations used- Gen med: general medicine; gen surg: general surgery; SSU a: short stay unit; ICU: intensive care unit

Footnotes for Table 2:

a The Short Stay Unit is a unit that operates closely with the Emergency Department to provide short-term patient monitoring and care for those who are not deemed as warranting a specialty in-patient admission.

b In two instances the diagnosis was unclear

c Indicates potential disposition disagreement with regards to level of care (in patient 32, Pediatrics wanted ICU admission instead of a general ward; in patient 76, general medicine wanted ICU admission instead of a general ward)

Regarding referral ‘level of care’: 87.2% (n=95) of patients were initially referred to in-hospital teams. Of these patients, 92% (n=87) were ultimately admitted to the hospital wards. 1 patient was escalated for care in the Intensive Care Unit (ICU) and 2 patients were discharged. 12.0% (n=13) of patients were initially referred to SSU level care.[[1]](#footnote-1) Of these, 6 were escalated to ward care with 6 remaining in the SSU and 1 patient being discharged. 1.0% (n=1) of cases were referred initially to the ICU before being redirected to the hospital ward

Supplementary Material Table 3: Full list of patient presenting complaints and patient contributing factors

**Patient Presenting Complaint Frequency**

**Fever 14**

**Abdominal Pain (female) 13**

**Central Neurology 13**

**Shortness of Breath 12**

**Falls 12**

**Trauma 9**

**Chest pain 7**

**Acute psychiatric changes 6**

**Peripheral Neurology 6**

**Palpitations 5**

**Post Operative Complications 4**

**Abdominal Pain (male) 4**

**Patient Contributing Factors Frequency**

**Chronic Medical Condition 22**

**Pain/Poor Medical State 14**

**History of Malignancy 11**

**Representation to ED 11**

**Suspected COVID-19 10**

**Behavioural Difficulties 8**

**Complex Social History 4**

Supplementary Material Table 4: Full list of clinician and system-related themes

**Clinician and System-related Themes Frequency**

**Refer Elsewhere 77**

**Review In-person First 36**

**Clinician Disagreement 35**

**Request Investigations 31**

**Communication Issues 15**

**Unclear Guidelines 9**

**Requested ED Treatment 4**

1. [↑](#footnote-ref-1)
